# Supplementary material for: Importance of Mediation against Addictive, Affective-Emotional, and Sexual Behavior in Adolescents. Educational System versus Associations
Source: MDPI journal article supplement (doi:10.3390/ijerph18031249), 2021-01-30
Supplement: s1 [file s1]

**Table S1.** Consolidated criteria for reporting qualitative studies (COREQ): 32-item checklist.

| No                                             | Item                                     | Guide Questions/Description                                                                                                                              | Response                                                                                                             |
|------------------------------------------------|------------------------------------------|----------------------------------------------------------------------------------------------------------------------------------------------------------|----------------------------------------------------------------------------------------------------------------------|
| <b>Domain 1: Research team and reflexivity</b> |                                          |                                                                                                                                                          |                                                                                                                      |
| Personal Characteristics                       |                                          |                                                                                                                                                          |                                                                                                                      |
| 1.                                             | Interviewer/facilitator                  | Which author/s conducted the interview or focus group?                                                                                                   | All the interviews were conducted by the author AMBR.                                                                |
| 2.                                             | Credentials                              | What were the researcher's credentials? E.g. PhD, MD                                                                                                     | AMBR, MAGC and JRGL were PhD.                                                                                        |
| 3.                                             | Occupation                               | What was their occupation at the time of the study?                                                                                                      | All authors were professor.                                                                                          |
| 4.                                             | Gender                                   | Was the researcher male or female?                                                                                                                       | AMBR and JRGL are men, and MAGC is a woman.                                                                          |
| 5.                                             | Experience and training                  | What experience or training did the researcher have?                                                                                                     | All researchers had experience in carrying out qualitative research and the have been trained to conduct interviews. |
| Relationship with participants                 |                                          |                                                                                                                                                          |                                                                                                                      |
| 6.                                             | Relationship established                 | Was a relationship established prior to study commencement?                                                                                              | No, there wasn't.                                                                                                    |
| 7.                                             | Participant knowledge of the interviewer | What did the participants know about the researcher? e.g. personal goals, reasons for doing the research                                                 | Name, occupation, reasons for doing the research.                                                                    |
| 8.                                             | Interviewer characteristics              | What characteristics were reported about the interviewer/facilitator? e.g. Bias, assumptions, reasons and interests in the research topic                | Name, occupation, contact method, reasons for doing the research.                                                    |
| <b>Domain 2: Study design</b>                  |                                          |                                                                                                                                                          |                                                                                                                      |
| Theoretical framework                          |                                          |                                                                                                                                                          |                                                                                                                      |
| 9.                                             | Methodological orientation and Theory    | What methodological orientation was stated to underpin the study? e.g. grounded theory, discourse analysis, ethnography, phenomenology, content analysis | Phenomenological and ethnographic approach with a discourse and content analysis.                                    |
| Participant selection                          |                                          |                                                                                                                                                          |                                                                                                                      |
| 10.                                            | Sampling                                 | How were participants selected? e.g. purposive, convenience, consecutive, snowball                                                                       | Convenience sampling.                                                                                                |
| 11.                                            | Method of approach                       | How were participants approached? e.g. face-to-face, telephone, mail, email                                                                              | Face to face.                                                                                                        |
| 12.                                            | Sample size                              | How many participants were in the study?                                                                                                                 | Total 427; 320 young high school students and 107 belonging to associations.                                         |
| 13.                                            | Non-participation                        | How many people refused to participate or dropped out? Reasons?                                                                                          | 11 for personal reasons.                                                                                             |
| Setting                                        |                                          |                                                                                                                                                          |                                                                                                                      |
| 14.                                            | Setting of data collection               | Where was the data collected? e.g. home, clinic, workplace                                                                                               | The interviews were carried out in different places.                                                                 |

|     |                              |                                                                                   |                                                                |
|-----|------------------------------|-----------------------------------------------------------------------------------|----------------------------------------------------------------|
| 15. | Presence of non-participants | Was anyone else present besides the participants and researchers?                 | No, it was not.                                                |
| 16. | Description of sample        | What are the important characteristics of the sample? e.g. demographic data, date | Young high school students and / or, belonging to associations |

#### Data collection

|     |                        |                                                                               |                                    |
|-----|------------------------|-------------------------------------------------------------------------------|------------------------------------|
| 17. | Interview guide        | Were questions, prompts, guides provided by the authors? Was it pilot tested? | Yes, they were. / Yes, it was.     |
| 18. | Repeat interviews      | Were repeat inter views carried out? If yes, how many?                        | No, they weren't.                  |
| 19. | Audio/visual recording | Did the research use audio or visual recording to collect the data?           | Audio recording.                   |
| 20. | Field notes            | Were field notes made during and/or after the interview or focus group?       | Yes, they were (field notes).      |
| 21. | Duration               | What was the duration of the inter views or focus group?                      | 60 minutes.                        |
| 22. | Data saturation        | Was data saturation discussed?                                                | Yes, it was.                       |
| 23. | Transcripts returned   | Were transcripts returned to participants for comment and/or correction?      | Yes. Reviewed by 476 participants. |

### Doman 3: Analysis and findings

#### Data analysis

|     |                                |                                                             |                                         |
|-----|--------------------------------|-------------------------------------------------------------|-----------------------------------------|
| 24. | Number of data coders          | How many data coders coded the data?                        | Two (AMBR and MAGC).                    |
| 25. | Description of the coding tree | Did authors provide a description of the coding tree?       | Yes, we did.                            |
| 26. | Derivation of themes           | Were themes identified in advance or derived from the data? | Themes were derived using both methods. |
| 27. | Software                       | What software, if applicable, was used to manage the data?  | NUDIST Nvivo 11.                        |
| 28. | Participant checking           | Did participants provide feedback on the findings?          | Yes. Reviewed by 49 informants.         |

#### Reporting

|     |                              |                                                                                                                                 |                                    |
|-----|------------------------------|---------------------------------------------------------------------------------------------------------------------------------|------------------------------------|
| 29. | Quotations presented         | Were participant quotations presented to illustrate the themes/findings? Was each quotation identified? e.g. participant number | Yes, there were. / Yes, there was. |
| 30. | Data and findings consistent | Was there consistency between the data presented and the findings?                                                              | Yes, there was.                    |
| 31. | Clarity of major themes      | Were major themes clearly presented in the findings?                                                                            | Yes, they were.                    |
| 32. | Clarity of minor themes      | Is there a description of diverse cases or discussion of minor themes?                                                          | Yes, there is.                     |

Developed from: Tong, A. Sainsbury, P., and Craig, J. 2007. Consolidated criteria for reporting qualitative research (COREQ): A 32- item checklist for interviews and focus group. Int. J. Qual. Health Care 19: 349-357.
